# Supplementary material
Source: publisher figshare collection journal article supplement (https://frontiersin.figshare.com/ndownloader/files/14057378)
Supplement: Supplementary file [file 14057378]

**Supplementary Figure 1. The CB<sub>1</sub> receptor is enriched in focal cortical dysplasia type II in cells with overactive mTORC1 signalling.** (A) Representative

immunofluorescence images showing the presence of CB<sub>1</sub> receptors in samples from Type I and II focal cortical dysplasia (FCD) and control brains, revealed with an anti-CB<sub>1</sub> antibody (red). Cells with over-active mTORC1 signalling are stained with phospho-S6<sub>Ser235/236</sub> (green). High magnification images of CB<sub>1</sub> receptor expression associated with mTORC1 overactivation in FCD Type II are shown. (B) phospho-S6<sup>+</sup> cells were quantified in the dysplastic area and referred to total cell number (DAPI counterstaining). Control, FCD Type I and FCD Type II cases. (C) CB<sub>1</sub><sup>+</sup> phospho-S6<sup>+</sup> double-labelled cells were quantified and referred to total pS6<sup>+</sup> cells. Control, FCD Type I and FCD Type II cases (n= 6, 8 and 9, respectively). Statistical comparison versus control samples, \*\*\*\*, p<0.0001; \*\*, p<0.01; statistical comparison versus FCD Type I samples, ###, p<0.001; ##, p<0.01. Scale bar 25 µm, insets, 10 µm.

**Supplementary Figure 2. CB<sub>1</sub> receptors blockade attenuates mTORC1**

**overactivation in FCD organotypic cultures.** Organotypic cultures of FCD resections were cultured 7 days in vitro and exposed to the CB<sub>1</sub> receptor agonist HU-210 (1 µM), and rapamycin (1 µM) 90 min. (A) Representative images of immunofluorescence characterization with phospho-S6<sub>Ser235/236</sub> antibody. Phospho-S6<sup>+</sup> cells were quantified and referred to the total number of cells revealed by DAPI counterstaining. (B) Western blot analysis of phospho-S6<sub>Ser235/236</sub> was performed in slice extracts after 90 min incubation with HU-210 alone or together with SR141716 (25 µM), SR141716 or rapamycin (n= 4 experiments). Statistical comparison *versus* control samples, \*, p <0.05. Scale bar: 50 µm.

**Supplementary Table 1. SNPs analysed in Focal cortical dysplasia Type II and control brain genomic DNA extracts.**

| <b>Gene</b> | <b>SNP</b>  | <b>Functional Consequence</b>        |
|-------------|-------------|--------------------------------------|
| CNR1        | rs806365    | unknown                              |
| CNR1        | rs7766029   | unknown                              |
| CNR1        | rs806366    | unknown                              |
| CNR1        | rs806368    | utr variant 3 prime                  |
| CNR1        | rs12720071  | utr variant 3 prime                  |
| CNR1        | rs4707436   | utr variant 3 prime                  |
| CNR1        | rs1049353   | synonymous codon                     |
| CNR1        | rs806369    | intron variant, upstream variant 2KB |
| CNR1        | rs2023239   | intron variant                       |
| CNR1        | rs1535255   | intron variant                       |
| CNR1        | rs806379    | intron variant                       |
| CNR1        | rs9444584   | intron variant                       |
| CNR1        | rs9450898   | intron variant                       |
| CNR1        | rs806380    | intron variant                       |
| CNR1        | rs6454674   | intron variant, utr variant 5 prime  |
| CNR1        | rs2180619   | upstream variant 2KB                 |
| DAGLA       | rs4963304   | upstream variant 2KB                 |
| DAGLA       | rs7931563   | upstream variant 2KB                 |
| DAGLA       | rs7942387   | upstream variant 2KB                 |
| DAGLA       | rs198430    | synonymous codon                     |
| DAGLA       | rs198444    | synonymous codon                     |
| DAGLA       | rs34365114  | synonymous codon                     |
| DAGLA       | rs144674730 | missense                             |
| DAGLB       | rs143650244 | downstream variant 500B              |
| DAGLB       | rs187296513 | downstream variant 500B              |
| DAGLB       | rs3813518   | downstream variant 500B              |
| DAGLB       | rs3813517   | downstream variant 500B              |
| DAGLB       | rs836559    | utr variant 3 prime                  |
| DAGLB       | rs2303361   | missense                             |
| MGLL        | rs76802560  | downstream variant 500B              |
| MGLL        | rs6801421   | downstream variant 500B              |
| MGLL        | rs72969613  | utr variant 3 prime                  |
| MGLL        | rs4881      | synonymous codon                     |
| MGLL        | rs115970931 | utr variant 3 prime                  |
| FAAH        | rs932816    | upstream variant 2KB                 |
| FAAH        | rs4141964   | intron variant                       |
| FAAH        | rs324420    | missense                             |
| FAAH        | rs324419    | synonymous codon                     |
| FAAH        | rs2295632   | downstream variant 500B              |
| FAAH        | rs12029329  | downstream variant 500B              |
| CNR2        | rs12744386  | unknown                              |
| CNR2        | rs1130321   | utr variant 3 prime                  |
| CNR2        | rs1106      | utr variant 3 prime                  |
| CNR2        | rs2229579   | missense                             |
| CNR2        | rs2501431   | synonymous codon                     |
| CNR2        | rs41311993  | missense                             |
| CNR2        | rs35761398  | missense                             |
| CNR2        | rs2501432   | missense                             |
